# Supplementary material for: Identification and validation of a novel signature based on macrophage marker genes for predicting prognosis and drug response in kidney renal clear cell carcinoma by integrated analysis of single cell and bulk RNA sequencing
Source: publisher site journal article supplement (doi:10.18632/aging.205671), 2024-03-20
Supplement: Supplementary file [file aging-v16i6-205671-supplementary-material-SD1.pdf]

**SUPPLEMENTARY FIGURES**

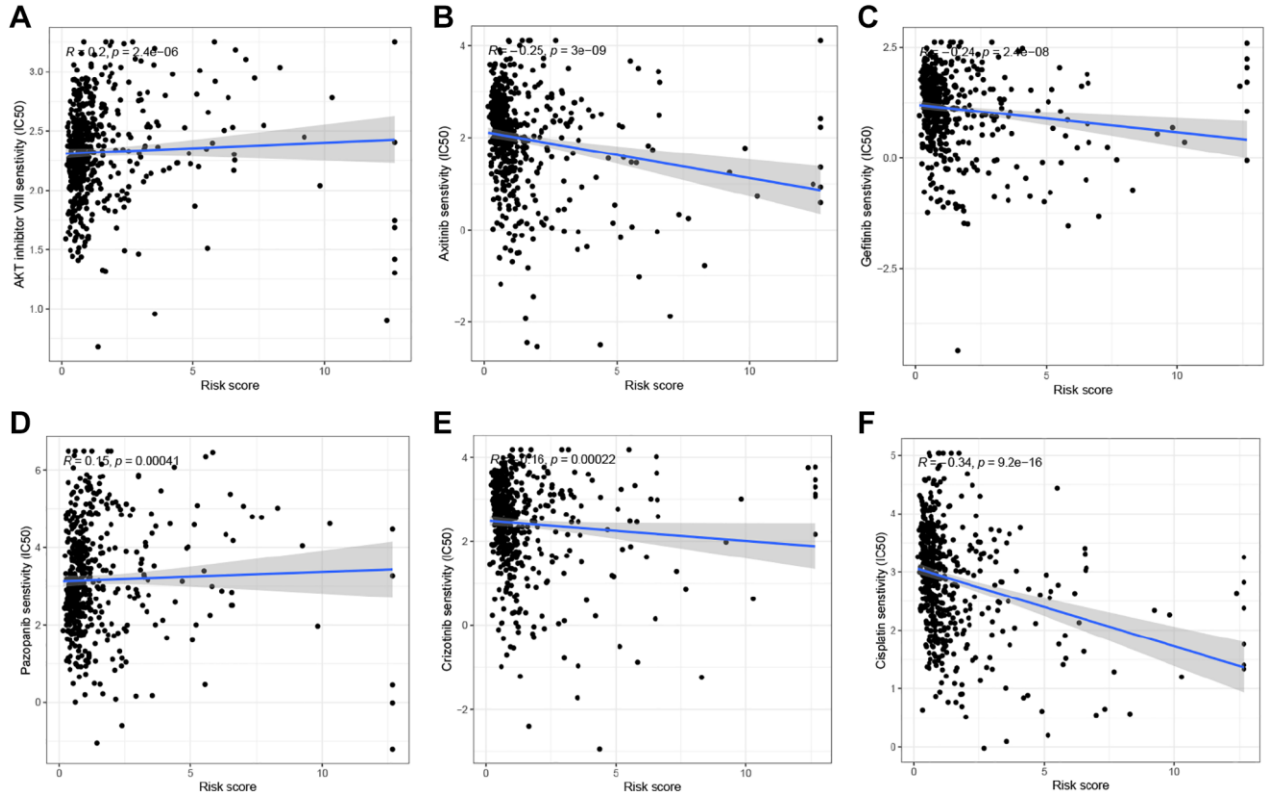

**Supplementary Figure 1. Correlation analysis between risk score and IC50 of drugs.** (A) AKT inhibitor, (B) Axitinib, (C) Gefitinib, (D) Pazopanib, (E) Crizotinib, and (F) Cisplatin.

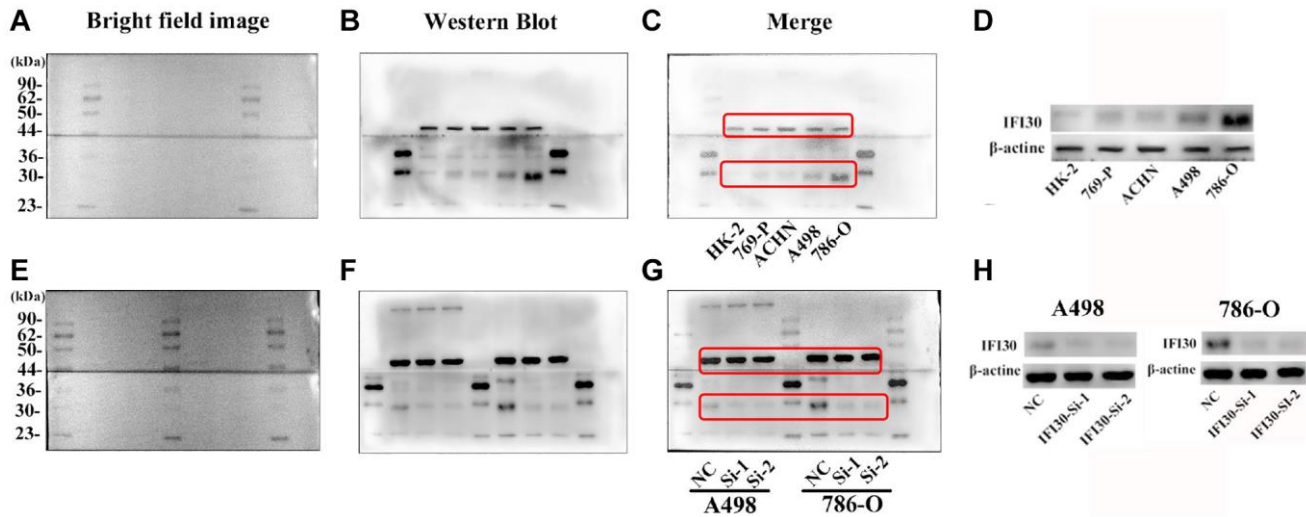

**Supplementary Figure 2. Original images for Western blots and gels.** The expression of IFI30 in cell lines: (A) Bright-field image, (B) Gels image, (C) Merge image, and (D) Cropped Western blots; Verification of the interference efficiency of IFI30 in A498 and 786-O: (E) Bright-field image, (F) Gels image, (G) Merge image, and (H) Cropped Western blots.
